# Supplementary material for: Effects of Probiotics Supplementation on Gastrointestinal Symptoms in Athletes: A Systematic Review of Randomized Controlled Trials
Source: MDPI journal article supplement (doi:10.3390/nu14132645), 2022-06-26
Supplement: s1 [file s1]

Supplementary materials

Figure S1. Risk of bias and applicability concerns parallel studies

| <u>Unique ID</u> | <u>Study ID</u>       | <u>D1a</u> | <u>D1b</u> | <u>D2</u> | <u>D3</u> | <u>D4</u> | <u>D5</u> | <u>Overall</u> |
|------------------|-----------------------|------------|------------|-----------|-----------|-----------|-----------|----------------|
| 1                | Gleeson et al. 2011   | !          | +          | +         | +         | +         | !         | !              |
| 2                | Kekkonen et al. 2007  | +          | +          | !         | +         | +         | +         | !              |
| 3                | Pugh et al. 2019      | +          | +          | +         | +         | +         | +         | +              |
| 4                | Pumpa et al. 2019     | +          | +          | +         | +         | +         | +         | +              |
| 5                | Roberts et al. 2016   | +          | +          | +         | +         | +         | +         | +              |
| 6                | Schreiber et al. 2021 | +          | +          | +         | +         | +         | +         | +              |
| 7                | West et al. 2011      | +          | +          | +         | +         | +         | +         | +              |
| 8                | West et al. 2014      | +          | +          | +         | +         | +         | +         | +              |

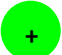

Low risk

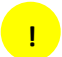

Some concerns

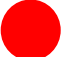

High risk

Legend:

|     |                                                         |
|-----|---------------------------------------------------------|
| D1a | Randomisation process                                   |
| D1b | Timing of identification or recruitment of participants |
| D2  | Deviations from the intended interventions              |
| D3  | Missing outcome data                                    |
| D4  | Measurement of the outcome                              |
| D5  | Selection of the reported result                        |

Figure S2. Risk of bias and applicability concerns crossover studies

| <u>Unique ID</u> | <u>Study ID</u>   | <u>D1</u> | <u>DS</u> | <u>D2</u> | <u>D3</u> | <u>D4</u> | <u>D5</u> | <u>Overall</u> |
|------------------|-------------------|-----------|-----------|-----------|-----------|-----------|-----------|----------------|
| 1                | Pugh et al. 2020  | !         | +         | +         | +         | +         | !         | !              |
| 2                | Shing et al. 2014 | +         | +         | !         | +         | +         | !         | !              |

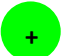

Low risk

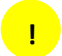

Some concerns

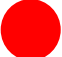

High risk

|    |                                                |
|----|------------------------------------------------|
| D1 | Randomisation process                          |
| DS | Bias arising from period and carryover effects |
| D2 | Deviations from the intended interventions     |
| D3 | Missing outcome data                           |
| D4 | Measurement of the outcome                     |
| D5 | Selection of the reported result               |
